# Supplementary material for: Systemic Antimicrobial Treatment of Chronic Osteomyelitis in Adults: A Narrative Review
Source: MDPI journal article supplement (doi:10.3390/antibiotics12060944), 2023-05-23
Supplement: s1 [file s1]

## Supplementary material File S1

### PICO strategy (Patient/Problem, Intervention, Comparison, Outcome)

1. PICO  
P: adult patients with chronic osteomyelitis  
I: short-term antibiotic therapy (< 6 weeks)  
C: long-term antibiotic therapy (≥ 6 weeks)  
O: mortality, relapse rate, adverse effects
2. PICO  
P: adult patients with chronic osteomyelitis  
I: oral antibiotic therapy or short-term parenteral therapy (< 2 weeks) followed by oral antibiotic therapy  
C: parenteral antibiotic therapy  
O: mortality, relapse rate, adverse effects
3. PICO  
P: adult patients with chronic osteomyelitis  
I: combination antibiotic therapy with rifampicin for staphylococcal infections  
C: antibiotic therapy without addition of rifampicin  
O: mortality, relapse rate, adverse effects

### Search strategy for PUBMED

#### PICO 1

("osteomyelitis"[MeSH Terms] OR "osteomyelitis\*" [Title/Abstract] OR "spondylitis"[MeSH Terms] OR "spondylitis\*" [Title/Abstract] OR "osteitis"[MeSH Terms] OR "osteitis" [Title/Abstract] OR "bone infection\*" [Title/Abstract]) AND ("treatment outcome"[MeSH Terms] OR "treatment outcome\*" [Title/Abstract] OR "efficac\*" [Title/Abstract] OR "effectiveness\*" [Title/Abstract] OR "recurrence"[MeSH Terms] OR "recurrence\*" [Title/Abstract] OR "relapse\*" [Title/Abstract] OR "reinfection"[MeSH Terms] OR "reinfection\*" [Title/Abstract] OR "recurrent infection\*" [Title/Abstract] OR "symptom flare up"[MeSH Terms] OR "symptom flare up\*" [Title/Abstract] OR "symptom exacerbation\*" [Title/Abstract] OR "mortality"[MeSH Terms] OR "mortalit\*" [Title/Abstract] OR "fatality rate\*" [Title/Abstract] OR "death rate\*" [Title/Abstract] OR "drug related side effects and adverse reactions"[MeSH Terms] OR "drug related side effects and adverse reaction\*" [Title/Abstract] OR "adverse reaction\*" [Title/Abstract] OR "adverse drug reaction\*" [Title/Abstract] OR "side effect\*" [Title/Abstract] OR "adverse event\*" [Title/Abstract] OR "adverse drug event\*" [Title/Abstract] OR "drug toxicity" [Title/Abstract]) AND ("anti-bacterial agents"[MeSH Terms] OR "antibacterial\*" [Title/Abstract] OR "anti bacterial\*" [Title/Abstract] OR "antibiotic\*" [Title/Abstract] OR "anti-infective agents"[MeSH Terms] OR "anti infective\*" [Title/Abstract] OR "antiinfective\*" [Title/Abstract] OR "anti microbial\*" [Title/Abstract] OR "antimicrobial\*" [Title/Abstract] OR "anti microbial" [Title/Abstract]) AND ("duration of therapy"[MeSH Terms] OR "duration of therapy" [Title/Abstract] OR "therapy duration\*" [Title/Abstract] OR "duration of treatment" [Title/Abstract] OR "treatment duration\*" [Title/Abstract] OR "antibiotic duration\*" [Title/Abstract] OR "duration of antibiotic\*" [Title/Abstract] OR "duration of antimicrobial" [Title/Abstract] OR "antimicrobial duration\*" [Title/Abstract] OR "treatment length" [Title/Abstract] OR "length of therapy" [Title/Abstract] OR "length of treatment" [Title/Abstract] OR "therapy

length"[Title/Abstract])

## PICO 2

("osteomyelitis"[MeSH Terms] OR "osteomyelitis\*"[Title/Abstract] OR "spondylitis"[MeSH Terms] OR "spondylitis\*"[Title/Abstract] OR "osteitis"[MeSH Terms] OR "osteitis"[Title/Abstract] OR "bone infection\*"[Title/Abstract]) AND ("treatment outcome"[MeSH Terms] OR "treatment outcome\*"[Title/Abstract] OR "efficac\*"[Title/Abstract] OR "effectiveness\*"[Title/Abstract] OR "recurrence"[MeSH Terms] OR "recurrence\*"[Title/Abstract] OR "relapse\*"[Title/Abstract] OR "reinfection"[MeSH Terms] OR "reinfection\*"[Title/Abstract] OR "recurrent infection\*"[Title/Abstract] OR "symptom flare up"[MeSH Terms] OR "symptom flare up\*"[Title/Abstract] OR "symptom exacerbation\*"[Title/Abstract] OR "mortality"[MeSH Terms] OR "mortalit\*"[Title/Abstract] OR "fatality rate\*"[Title/Abstract] OR "death rate\*"[Title/Abstract] OR "drug related side effects and adverse reactions"[MeSH Terms] OR "drug related side effects and adverse reaction\*"[Title/Abstract] OR "adverse reaction\*"[Title/Abstract] OR "adverse drug reaction\*"[Title/Abstract] OR "side effect\*"[Title/Abstract] OR "adverse event\*"[Title/Abstract] OR "adverse drug event\*"[Title/Abstract] OR "drug toxicity"[Title/Abstract]) AND ("anti-bacterial agents"[MeSH Terms] OR "antibacterial\*"[Title/Abstract] OR "anti bacterial\*"[Title/Abstract] OR "antibiotic\*"[Title/Abstract] OR "anti-infective agents"[MeSH Terms] OR "anti infective\*"[Title/Abstract] OR "antiinfective\*"[Title/Abstract] OR "anti microbial\*"[Title/Abstract] OR "antimicrobial\*"[Title/Abstract] OR "anti microbial"[Title/Abstract]) AND ("Drug Administration Routes"[MeSH Terms] OR "drug administration route\*"[Title/Abstract] OR "route of administration\*"[Title/Abstract] OR "administration, oral"[MeSH Terms] OR "oral\*"[Title/Abstract] OR "peroral\*"[Title/Abstract] OR "injections, intravenous"[MeSH Terms] OR "infusions, intravenous"[MeSH Terms] OR "infusions, parenteral"[MeSH Terms] OR "intravenous\*"[Title/Abstract] OR "parenteral\*"[Title/Abstract] OR "infusion\*"[Title/Abstract] OR "per os\*"[Title/Abstract])

## PICO 3

("osteomyelitis"[MeSH Terms] OR "osteomyelitis\*"[Title/Abstract] OR "spondylitis"[MeSH Terms] OR "spondylitis\*"[Title/Abstract] OR "osteitis"[MeSH Terms] OR "osteitis"[Title/Abstract] OR "bone infection\*"[Title/Abstract]) AND ("treatment outcome"[MeSH Terms] OR "treatment outcome\*"[Title/Abstract] OR "efficac\*"[Title/Abstract] OR "effectiveness\*"[Title/Abstract] OR "recurrence"[MeSH Terms] OR "recurrence\*"[Title/Abstract] OR "relapse\*"[Title/Abstract] OR "reinfection"[MeSH Terms] OR "reinfection\*"[Title/Abstract] OR "recurrent infection\*"[Title/Abstract] OR "symptom flare up"[MeSH Terms] OR "symptom flare up\*"[Title/Abstract] OR "symptom exacerbation\*"[Title/Abstract] OR "mortality"[MeSH Terms] OR "mortalit\*"[Title/Abstract] OR "fatality rate\*"[Title/Abstract] OR "death rate\*"[Title/Abstract] OR "drug related side effects and adverse reactions"[MeSH Terms] OR "drug related side effects and adverse reaction\*"[Title/Abstract] OR "adverse reaction\*"[Title/Abstract] OR "adverse drug reaction\*"[Title/Abstract] OR "side effect\*"[Title/Abstract] OR "adverse event\*"[Title/Abstract] OR "adverse drug event\*"[Title/Abstract] OR "drug toxicity"[Title/Abstract]) AND ("anti-bacterial agents"[MeSH Terms] OR "antibacterial\*"[Title/Abstract] OR "anti bacterial\*"[Title/Abstract] OR "antibiotic\*"[Title/Abstract] OR "anti-infective agents"[MeSH Terms] OR "anti infective\*"[Title/Abstract] OR "antiinfective\*"[Title/Abstract] OR "anti microbial\*"[Title/Abstract] OR "antimicrobial\*"[Title/Abstract] OR "anti microbial"[Title/Abstract]) AND ("rifampin"[MeSH Terms] OR "rifampin\*"[Title/Abstract] OR "rifampicin\*"[Title/Abstract] OR ("Staphylococcal

Infections"[MeSH Terms] OR "staphylococcal\*"[Title/Abstract]) OR ("staphylococcus"[MeSH Terms] OR "staphylococcus\*"[Title/Abstract]))

## Search strategy for OVID-EMBASE

| #  | Query                                                                                                                                        | Results from 5 Jan 2023 |
|----|----------------------------------------------------------------------------------------------------------------------------------------------|-------------------------|
| 1  | exp osteomyelitis/                                                                                                                           | 44,714                  |
| 2  | osteomyelitis\$.ti,ab.                                                                                                                       | 28,690                  |
| 3  | exp spondylitis/                                                                                                                             | 76,056                  |
| 4  | spondylitis\$.ti,ab.                                                                                                                         | 29,531                  |
| 5  | exp osteitis/                                                                                                                                | 63,821                  |
| 6  | osteitis\$.ti,ab.                                                                                                                            | 5,092                   |
| 7  | exp bone infection/                                                                                                                          | 11,600                  |
| 8  | bone infection\$.ti,ab.                                                                                                                      | 2,189                   |
| 9  | 1 or 2 or 3 or 4 or 5 or 6 or 7 or 8                                                                                                         | 150,364                 |
| 10 | exp treatment outcome/                                                                                                                       | 2,122,926               |
| 11 | treatment outcome\$.ti,ab.                                                                                                                   | 92,859                  |
| 12 | exp recurrent disease/                                                                                                                       | 205,878                 |
| 13 | recurrent disease\$.ti,ab.                                                                                                                   | 23,699                  |
| 14 | recurrence\$.ti,ab.                                                                                                                          | 564,094                 |
| 15 | exp relapse/                                                                                                                                 | 169,369                 |
| 16 | relapse\$.ti,ab.                                                                                                                             | 334,619                 |
| 17 | exp reinfection/                                                                                                                             | 33,284                  |
| 18 | reinfection\$.ti,ab.                                                                                                                         | 12,722                  |
| 19 | symptom flare up\$.ti,ab.                                                                                                                    | 35                      |
| 20 | exp disease exacerbation/                                                                                                                    | 169,755                 |
| 21 | exacerbation\$.ti,ab.                                                                                                                        | 103,428                 |
| 22 | exp mortality/                                                                                                                               | 1,304,932               |
| 23 | mortalit\$.ti,ab.                                                                                                                            | 1,381,734               |
| 24 | fatality rate\$.ti,ab.                                                                                                                       | 16,262                  |
| 25 | death rate\$.ti,ab.                                                                                                                          | 32,560                  |
| 26 | exp side effect/                                                                                                                             | 644,716                 |
| 27 | side effect\$.ti,ab.                                                                                                                         | 424,426                 |
| 28 | exp adverse event/                                                                                                                           | 745,673                 |
| 29 | adverse event\$.ti,ab.                                                                                                                       | 371,941                 |
| 30 | adverse drug reaction\$.ti,ab.                                                                                                               | 30,430                  |
| 31 | adverse reaction\$.ti,ab.                                                                                                                    | 61,688                  |
| 32 | exp drug toxicity/                                                                                                                           | 149,329                 |
| 33 | drug toxicit\$.ti,ab.                                                                                                                        | 9,427                   |
| 34 | 10 or 11 or 12 or 13 or 14 or 15 or 16 or 17 or 18 or 19 or 20 or 21 or 22 or 23 or 24 or 25 or 26 or 27 or 28 or 29 or 30 or 31 or 32 or 33 | 5,744,220               |

|    |                                                                            |           |
|----|----------------------------------------------------------------------------|-----------|
| 35 | exp antiinfective agent/                                                   | 4,309,752 |
| 36 | antimicrobial\$.ti,ab.                                                     | 265,587   |
| 37 | antibacterial\$.ti,ab.                                                     | 122,860   |
| 38 | antibiotic\$.ti,ab.                                                        | 516,723   |
| 39 | antiinfective\$.ti,ab.                                                     | 1,126     |
| 40 | anti microbial\$.ti,ab.                                                    | 8,680     |
| 41 | anti bacterial\$.ti,ab.                                                    | 6,968     |
| 42 | anti infective\$.ti,ab.                                                    | 7,637     |
| 43 | exp antibiotic therapy/                                                    | 147,347   |
| 44 | antibiotic therap\$.ti,ab.                                                 | 53,135    |
| 45 | antibiotic treatment\$.ti,ab.                                              | 39,109    |
| 46 | anti biotic\$.ti,ab.                                                       | 394       |
| 47 | 35 or 36 or 37 or 38 or 39 or 40 or 41 or 42 or 43 or 44 or 45 or 46       | 4,499,479 |
| 48 | exp treatment duration/                                                    | 280,011   |
| 49 | treatment duration\$.ti,ab.                                                | 27,576    |
| 50 | duration of treatment\$.ti,ab.                                             | 26,356    |
| 51 | therapy duration\$.ti,ab.                                                  | 3,001     |
| 52 | duration of therap\$.ti,ab.                                                | 11,665    |
| 53 | treatment length\$.ti,ab.                                                  | 1,697     |
| 54 | length of treatment\$.ti,ab.                                               | 3,871     |
| 55 | therapy length\$.ti,ab.                                                    | 398       |
| 56 | length of therap\$.ti,ab.                                                  | 1,119     |
| 57 | antibiotic duration\$.ti,ab.                                               | 779       |
| 58 | duration of antibiotic\$.ti,ab.                                            | 3,668     |
| 59 | antimicrobial duration\$.ti,ab.                                            | 91        |
| 60 | duration of antimicrobial\$.ti,ab.                                         | 771       |
| 61 | 48 or 49 or 50 or 51 or 52 or 53 or 54 or 55 or 56 or 57 or 58 or 59 or 60 | 312,119   |
| 62 | exp drug administration route/                                             | 1,159,607 |
| 63 | administration route\$.ti,ab.                                              | 5,509     |
| 64 | route of administration\$.ti,ab.                                           | 14,783    |
| 65 | exp oral drug administration/                                              | 393,550   |
| 66 | oral\$.ti,ab.                                                              | 1,052,968 |
| 67 | peroral\$.ti,ab.                                                           | 8,635     |
| 68 | per os\$.ti,ab.                                                            | 8,293     |
| 69 | exp parenteral drug administration/                                        | 754,200   |
| 70 | parenteral\$.ti,ab.                                                        | 80,796    |
| 71 | intravenous\$.ti,ab.                                                       | 499,591   |
| 72 | infusion\$.ti,ab.                                                          | 371,906   |
| 73 | 62 or 63 or 64 or 65 or 66 or 67 or 68 or 69 or 70 or 71 or 72             | 2,657,717 |
| 74 | exp rifampicin/                                                            | 97,180    |
| 75 | rifampicin\$.ti,ab.                                                        | 23,883    |
| 76 | rifampin\$.ti,ab.                                                          | 11,408    |

|    |                                        |         |
|----|----------------------------------------|---------|
| 77 | exp Staphylococcus/                    | 248,510 |
| 78 | staphylococcus\$.ti,ab.                | 173,306 |
| 79 | exp Staphylococcus infection/          | 50,910  |
| 80 | staphylococcal\$.ti,ab.                | 27,603  |
| 81 | 74 or 75 or 76 or 77 or 78 or 79 or 80 | 388,210 |
| 82 | 9 and 34 and 47                        | 15,096  |
| 83 | 61 and 82                              | 1,986   |
| 84 | 73 and 82                              | 3,286   |
| 85 | 81 and 82                              | 4,808   |

exp osteomyelitis/  
osteomyelitis\$.ti,ab.

exp spondylitis/  
spondylitis\$.ti,ab.

exp osteitis/  
osteitis\$.ti,ab.

exp bone infection/  
bone infection\$.ti,ab.

1 or 2 or 3 or 4 or 5 or 6 or 7 or 8

exp treatment outcome/  
treatment outcome\$.ti,ab.

exp recurrent disease/  
recurrent disease\$.ti,ab.

recurrence\$.ti,ab.

exp relapse/  
relapse\$.ti,ab.

exp reinfection/  
reinfection\$.ti,ab.

symptom flare up\$.ti,ab.

exp disease exacerbation/  
exacerbation\$.ti,ab.

exp mortality/  
mortality\$.ti,ab.

fatality rate\$.ti,ab.

death rate\$.ti,ab.

exp side effect/  
side effect\$.ti,ab.

exp adverse event/  
adverse event\$.ti,ab.

adverse drug reaction\$.ti,ab.

adverse reaction\$.ti,ab.

exp drug toxicity/  
drug toxicity\$.ti,ab.

10 or 11 or 12 or 13 or 14 or 15 or 16 or 17 or 18 or 19 or 20 or 21 or 22 or 23 or 24 or 25 or 26 or 27

or 28 or 29 or 30 or 31 or 32 or 33

exp antiinfective agent/

antimicrobial\$.ti,ab.

antibacterial\$.ti,ab.

antibiotic\$.ti,ab.

antiinfective\$.ti,ab.

anti microbial\$.ti,ab.

anti bacterial\$.ti,ab.

anti infective\$.ti,ab.

exp antibiotic therapy/

antibiotic therap\$.ti,ab.

antibiotic treatment\$.ti,ab.

anti biotic\$.ti,ab.

35 or 36 or 37 or 38 or 39 or 40 or 41 or 42 or 43 or 44 or 45 or 46

exp treatment duration/

treatment duration\$.ti,ab.

duration of treatment\$.ti,ab.

therapy duration\$.ti,ab.

duration of therap\$.ti,ab.

treatment length\$.ti,ab.

length of treatment\$.ti,ab.

therapy length\$.ti,ab.

length of therap\$.ti,ab.

antibiotic duration\$.ti,ab.

duration of antibiotic\$.ti,ab.

antimicrobial duration\$.ti,ab.

duration of antimicrobial\$.ti,ab.

48 or 49 or 50 or 51 or 52 or 53 or 54 or 55 or 56 or 57 or 58 or 59 or 60

exp drug administration route/

administration route\$.ti,ab.

route of administration\$.ti,ab.

exp oral drug administration/

oral\$.ti,ab.

peroral\$.ti,ab.

per os\$.ti,ab.

exp parenteral drug administration/

parenteral\$.ti,ab.

intravenous\$.ti,ab.

infusion\$.ti,ab.

62 or 63 or 64 or 65 or 66 or 67 or 68 or 69 or 70 or 71 or 72

exp rifampicin/

rifampicin\$.ti,ab.

rifampin\$.ti,ab.

exp Staphylococcus/

staphylococcus\$.ti,ab.

exp Staphylococcus infection/  
staphylococcal\$.ti,ab.

74 or 75 or 76 or 77 or 78 or 79 or 80

9 and 34 and 47

61 and 82

73 and 82

81 and 82
